# Supplementary material
Source: PubMed Central journal article supplement (PMC8477454)
Supplement: NIHMS1731536-supplement-1.pdf [file NIHMS1731536-supplement-1.pdf]

## SUPPLEMENTARY INFORMATION

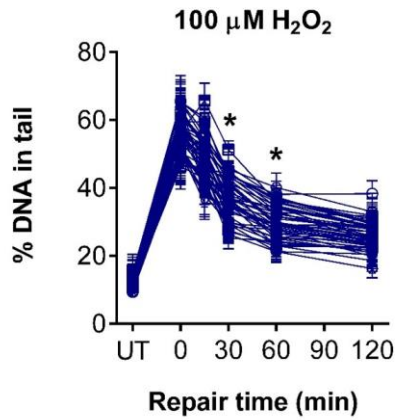

**Figure S1.** Analysis of repair kinetics for individuals analyzed once. Differences between 46 single visit individuals at each timepoint were evaluated using analysis of variance (one-way ANOVA). Statistically significant differences ( $p < 0.05$ ) are observed at after 30 and 60 minutes of repair. See also Tables S2 and S3.

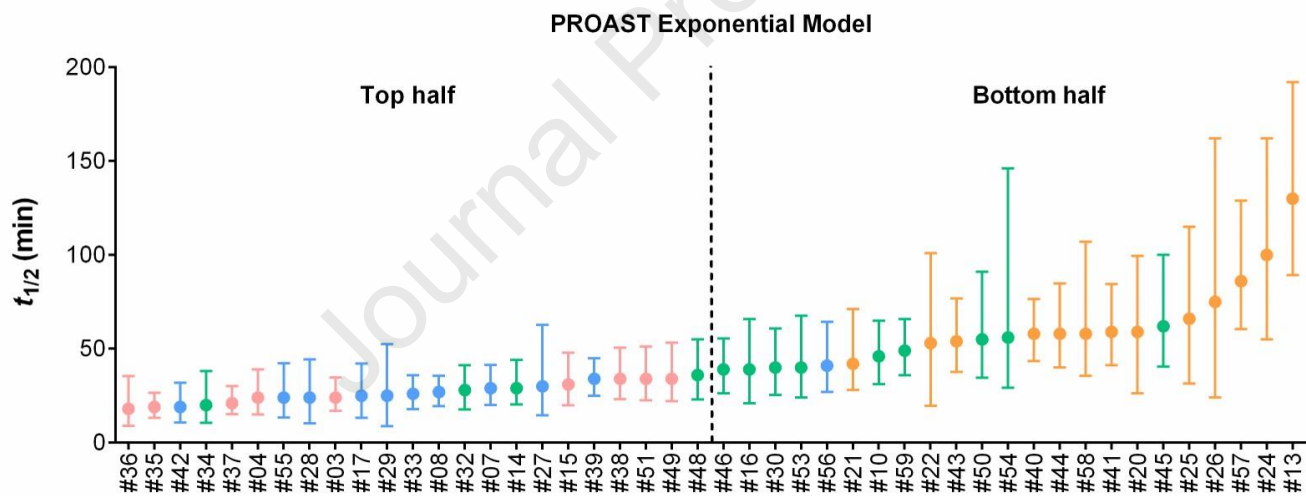

**Figure S2.** PROAST  $t_{1/2}$  values of 46 single visit individuals.

|     | #01    | #02    | #05                | #06     | #09     | #11                | #12                | #18     | #19                | #23 | Total score<br>(1 = 1 difference) |
|-----|--------|--------|--------------------|---------|---------|--------------------|--------------------|---------|--------------------|-----|-----------------------------------|
| #01 |        |        |                    |         |         |                    | 15 min             |         | 30 min             |     | 2                                 |
| #02 |        |        |                    |         |         |                    | 15 min             |         | 30 min             |     | 2                                 |
| #05 |        |        |                    |         | UT      | 60 min;<br>120 min |                    |         |                    |     | 3                                 |
| #06 |        |        |                    |         |         |                    | 120 min            |         | 60 min             |     | 2                                 |
| #09 |        |        | UT                 |         |         |                    | 120 min            |         |                    |     | 2                                 |
| #11 |        |        | 60 min;<br>120 min |         |         |                    | 60 min;<br>120 min | 120 min | 60 min;<br>120 min |     | 7                                 |
| #12 | 15 min | 15 min |                    | 120 min | 120 min | 60 min;<br>120 min |                    |         |                    |     | 6                                 |
| #18 |        |        |                    |         |         | 120 min            |                    |         |                    |     | 1                                 |
| #19 | 30 min | 30 min |                    | 60 min  |         | 60 min;<br>120 min |                    |         |                    |     | 5                                 |
| #23 |        |        |                    |         |         |                    |                    |         |                    |     | 0                                 |

**Table S1.** Summary of differences between repeat visit individuals by one-way analysis of variance (ANOVA).

|                |           | Raw %DNA in tail    |                 | Background corrected<br>%DNA in tail |                 |
|----------------|-----------|---------------------|-----------------|--------------------------------------|-----------------|
|                |           | <i>F</i> -statistic | <i>p</i> -value | <i>F</i> -statistic                  | <i>p</i> -value |
| Repair<br>time | Untreated | 0.64                | 0.95            |                                      |                 |
|                | 0 min     | 0.58                | 0.98            | 0.64                                 | 0.95            |
|                | 15 min    | 1.15                | 0.28            | 1.08                                 | 0.36            |
|                | 30 min    | 2.03                | < 0.05          | 1.44                                 | 0.07            |
|                | 60 min    | 1.92                | < 0.05          | 1.30                                 | 0.15            |
|                | 120 min   | 1.03                | 0.44            | 0.92                                 | 0.62            |

**Table S2.** Analysis of variance (ANOVA) of 46 single visit individuals.

|                            | Degree of<br>freedom |
|----------------------------|----------------------|
| Between people             | 45                   |
| Between repeat experiments | 92                   |
| Total                      | 137                  |

**Table S3.** Calculation of degrees of freedom of 46 single visit individuals.
